# Supplementary material for: Formation and osteoblast behavior of HA nano-rod/fiber patterned coatings on tantalum in porous and compact forms
Source: Royal Society of Chemistry journal article supplement (doi:10.1039/c5tb00839e), 2015-01-01
Supplement: c5tb00839e1.pdf [file c5tb00839e1.pdf]

**Electronic Supplementary Information (ESI)**

*of*

**Formation and osteoblast behavior of HA nano-rods/fibers patterned  
coatings on tantalum in porous and compact forms**

Cuicui Wang, Zhibin Fan, Yong Han\*

State-key Laboratory for Mechanical Behavior of Materials, Xi'an Jiaotong University,

Xi'an 710049, China

\* To whom correspondence should be addressed. E-mail: [yonghan@mail.xjtu.edu.cn](mailto:yonghan@mail.xjtu.edu.cn) (Y. Han).

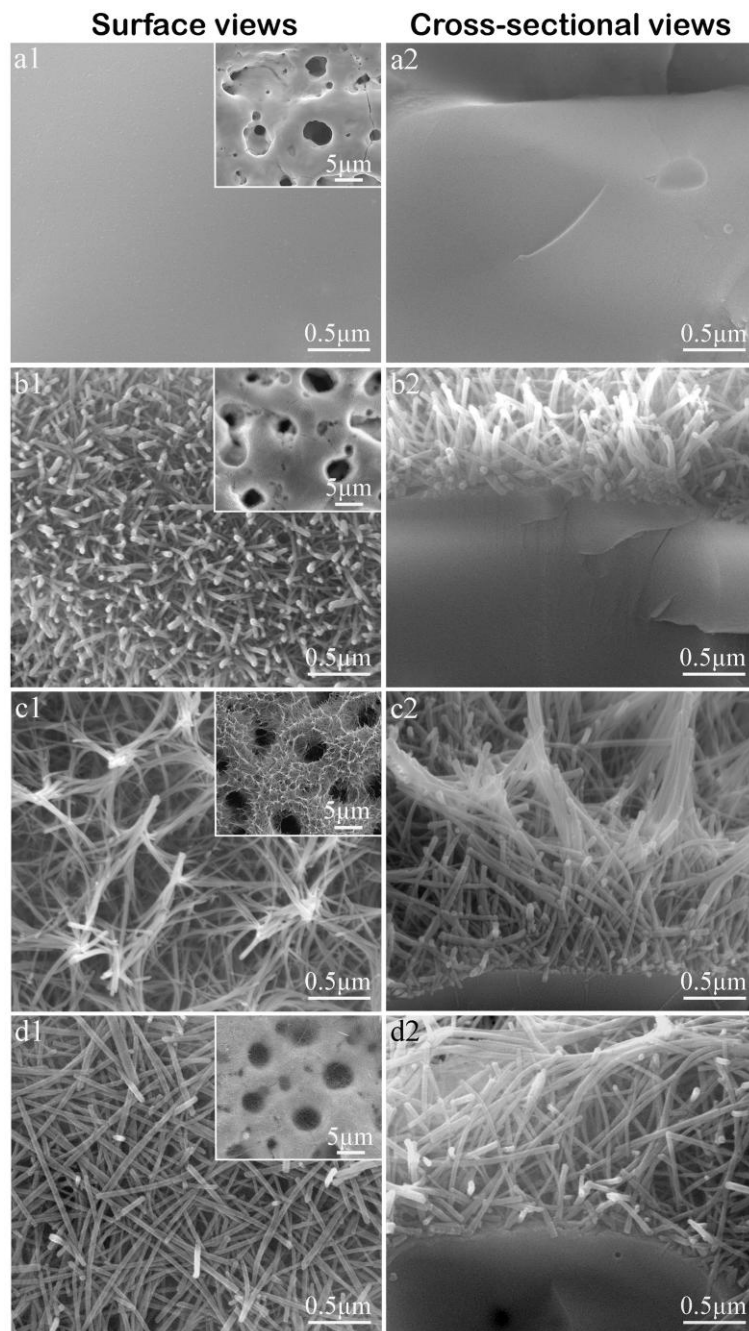

Figure S1. Surface and cross-sectional morphologies of the MAOed compact Ta discs (a1, a2) before and after HT for (b1, b2) 3, (c1, c2) 6 and (d1, d2) 24 h, respectively.

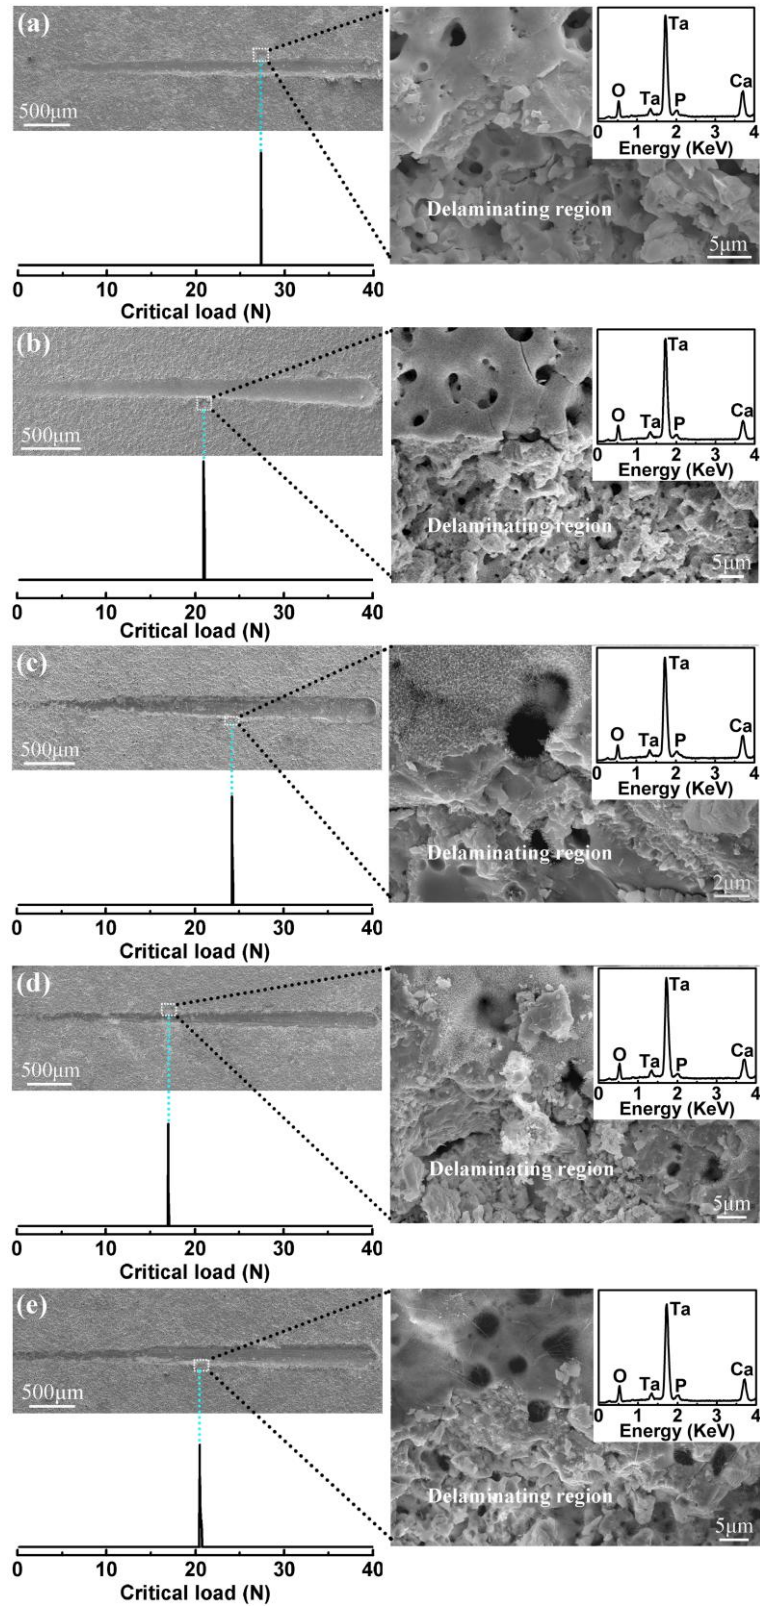

Figure S2. Curves of acoustic output versus load and scratch images of MAO<sub>0</sub> coating (a) without and (b) with immersion for 20 weeks, HT3h coating (c) without and (d) with immersion for 20 weeks, and (e) HT24h coating without immersion, together

with the amplified views of the *Lc*-caused failure areas, in which the EDX spectra detected on the delaminating regions of the coatings show the presence of Ca and P, indicating that the delaminations occurred in the interiors of the coatings.
